# Supplementary material for: Does Exposure Therapy Lead to Changes in Attention Bias and Approach-Avoidance Bias in Patients with Social Anxiety Disorder?
Source: Springer Nature journal article supplement (doi:10.1007/s10608-018-9934-5), 2018-06-28
Supplement: MOESM2 [file 15893830]

| Appendix B | | | | | |
| --- | --- | --- | --- | --- | --- |
| *Multilevel Regression Analyses for a) VRET, iVET, and Waiting-List on all Measures at Pre- and Postassessment and b) VRET and iVET on all Measures at Preassessment, Postassessment, and 3-Month Follow-Up (Kampmann et al., 2016).* | | | | | |
|  | LSAS-SR | | FNE-B | |
|  | *b* | *SE* | *b* | *SE* |
| a) |  |  |  |  |
| VRET baseline | 73.00 | 4.27*** | 41.05 | 1.71*** |
| iVET baseline | 69.15 | 4.27*** | 38.50 | 1.71*** |
| WL baseline | 64.35 | 4.27*** | 73.40 | 1.71*** |
| WL pre-post Δ | -3.88 | 3.90ns | -0.98 | 2.19ns |
| WL pre-post Δ × VRET | -13.92 | 5.46* | -3.99 | 3.06ns |
| WL pre-post Δ × iVET | -27.19 | 5.52*** | -12.56 | 3.09*** |
| b) |  |  |  |  |
| Intercept | 65.64 | 3.45*** | 38.00 | 1.42*** |
| VRET | 2.66 | 4.80ns | 1.43 | 1.98ns |
| iVET pre-post Δ | -29.94 | 3.38*** | -12.00 | 1.87*** |
| iVET pre-post Δ × VRET | 13.42 | 4.66** | 7.03 | 2.57** |
| iVET pre-fu Δ | -35.01 | 3.82*** | -14.82 | 2.13*** |
| iVET pre-fu Δ × VRET | 20.06 | 5.65** | 8.89 | 3.16** |
| *Note*. LSAS-SR = Liebowitz Social Anxiety Scale-Self Report; FNE-B = Fear of Negative Evaluation Scale-Brief Form; Pre = preassessment; Post = postassessment; Fu = 3-month follow-up; VRET = Virtual Reality Exposure Therapy; iVET = in Vivo Exposure Therapy; WL = waiting-list.  * *p* < .05; ** *p* < .01; *** *p* < .001. | | | | | |
